# Supplementary material
Source: publisher figshare collection journal article supplement (https://sage.figshare.com/ndownloader/files/31540132)
Supplement: Supplementary file 1 [file 31540132]

**Supplementary material 1: The DanFunD cohort**

Supplement material for Social Position and Functional Somatic Disorders bySigne U. Schovsbo, Thomas M. Dantoft, Betina H. Thuesen, Katja B. Leth-Møller, Lene F. Eplov, Marie W. Petersen, Torben Jørgensen, Merete Osler in Scandinavian Journal of Public Health.

| **The DanFunD cohort** | **Overall** |
| --- | --- |
| **N** | 9656 |
| **Age (median [IQR])** | 54.00 [44.00, 64.00] |
| **Sex = female (%)** | 5203 (53.9) |
| **Traditional FSD (%)** | 1309 (13.9) |
| **IBS (%)** | 337 (3.6) |
| **FM (%)** | 442 (4.6) |
| **CFS (%)** | 823 (8.6) |
| **IBS-pure (%)*** | 193 (2.3) |
| **FM-pure (%)*** | 250 (3.0) |
| **CFS-pure (%)*** | 572 (6.6) |
| **BDS (%)** | 1544 (16.1) |
| **Single-organ BDS (%)*** | 1447 (15.3) |
| **Multi-organ BDS (%)*** | 96 (1.2) |
| **Symptom profiles (%)** |  |
| **Missing** | 53 (0.5) |
| **All symptoms profile*** | 190 (3.7) |
| **Multiple symptoms profiles*** | 1144 (18.9) |
| **Single symptoms profiles*** | 3356 (40.6) |
| **No symptoms profile*** | 4913 (51.2) |
| **Cohabitation (%)** |  |
| **Missing** | 194 (2.0) |
| **Cohabitating** | 7332 (75.9) |
| **Non-cohabitating** | 2130 (22.1) |
| **Vocational training (%)** |  |
| **Missing** | 286 (3.0) |
| **Skilled worker or <1 year of vocational training** | 4116 (42.6) |
| **<3 years of vocational training** | 1804 (18.7) |
| **3 - 4 years of vocational training** | 2379 (24.6) |
| **>4 years of vocational training** | 1071 (11.1) |
| **Employment (%)** |  |
| **Missing** | 107 (1.1) |
| **Employed** | 6488 (67.2) |
| **Not employed** | 3061 (31.7) |
| **Subjective social status (%)** |  |
| **Missing** | 103 (1.1) |
| **Highest** | 2769 (28.7) |
| **High** | 4877 (50.5) |
| **Low** | 1426 (14.8) |
| **Lowest** | 481 (5.0) |
| **Missing, total (%)** | 837 (8.7) |

*Subgroup analyses: IBS-pure: n=8279, FM-pure: n=8336, CFS-pure: n=8658, Single-organ BDS n=9482, Multi-organ BDS n=8131, No symptoms profile: n =9603, Single symptom profiles: n=8269, Multiple symptoms profiles: n=6057, All symptoms profile: n=5103.
